## **Perceived norms about male circumcision and personal circumcision status: a cross-sectional, population-based study in rural Uganda**

**Authors:** Jessica M. Perkins<sup>1,2\*</sup>, Bernard Kakuhikire<sup>3</sup>, Charles Baguma<sup>3</sup>, Sehee Jeon<sup>1</sup>, Sarah F. Walker<sup>1</sup>, Rohit Dongre<sup>1</sup>, Viola Kyokunda<sup>3</sup>, Mercy Juliet<sup>3</sup>, Emily N. Satinsky<sup>4,5</sup>, Alison B. Comfort<sup>6</sup>, Mark Siedner<sup>5,7,8</sup>, Scholastic Ashaba<sup>3</sup>, Alexander C. Tsai<sup>5,7,8</sup>

<sup>1</sup>Department of Human and Organizational Development, Peabody College, Vanderbilt University, Nashville, TN, USA

<sup>2</sup>Vanderbilt Institute for Global Health, Vanderbilt University Medical Center, Nashville, TN, USA

<sup>3</sup>Mbarara University of Science and Technology, Mbarara, Uganda

<sup>4</sup>Department of Psychology, University of Southern California, Los Angeles, CA, USA

<sup>5</sup>Center for Global Health, Massachusetts General Hospital, Boston MA USA

<sup>6</sup>Bixby Center for Global Reproductive Health, University of California, San Francisco, USA

<sup>7</sup>Harvard Medical School, Boston, MA, USA

<sup>8</sup>Mongan Institute, Massachusetts General Hospital, Boston MA USA

**\*Corresponding author:** Dr. Jessica M. Perkins, 230 Appleton Place, Nashville, TN 37203-5721; [jessica.m.perkins@vanderbilt.edu](mailto:jessica.m.perkins@vanderbilt.edu), Phone: (615) 875-3289, Fax: 615-343-2661

## ABSTRACT

**Introduction:** Over the past decade, 15 high-priority countries in eastern and southern Africa have promoted voluntary medical male circumcision for HIV and STI prevention. Despite male circumcision prevalence in Uganda nearly doubling from 26% in 2011 to 43% in 2016, it remained below the target level by 2020. Little is known about perceived norms of male circumcision and their association with circumcision uptake among men.

**Methods:** We conducted a cross-sectional study targeting all adult residents across eight villages in Rwampara District, southwestern Uganda in 2020-2022. We compared what men and women reported as the adult male circumcision prevalence within their village (perceived norm: >50% (most), 10% to <50% (some), <10%, (few), or do not know) to the aggregated prevalence of circumcision as reported by men aged <50 years. We used a modified multivariable Poisson regression model to estimate the association between perceived norms about male circumcision uptake and personal circumcision status among men.

**Results:** Overall, 167 (38%) men < 50 years old were circumcised (and 27% of all men were circumcised). Among all 1566 participants (91% response rate), 189 (27%) men and 177 (20%) women underestimated the male circumcision prevalence, thinking that few men in their own village had been circumcised. Additionally, 10% of men and 25% of women reported not knowing the prevalence. Men who underestimated the prevalence were less likely to be circumcised (aRR = 0.51, 95% CI 0.37 to 0.83) compared to those who thought that some village men were circumcised, adjusting for perceived personal risk of HIV, whether any same-household women thought most men were circumcised, and other sociodemographic factors.

**Conclusions:** Across eight villages, a quarter of the population underestimated the local prevalence of male circumcision. Men who underestimated circumcision uptake were less likely to be circumcised. Future research should evaluate norms-based approaches to promoting male circumcision uptake. Strategies may include disseminating messages about the increasing prevalence of adult male circumcision uptake in Uganda and providing personalized normative feedback to men who underestimated local rates about how uptake is greater than they thought.

**Key words:** misperceived norms, descriptive norms, HIV, STI, male circumcision, sexual health

## INTRODUCTION

In 2007, the World Health Organization and the Joint United Nations Programme on HIV/AIDS recommended increasing voluntary medical male circumcision (VMMC) uptake in populations at high risk of HIV infection, especially in HIV-endemic countries [1]. This recommendation was based on research demonstrating male circumcision's ability to reduce HIV acquisition risk among men [2-6] and indirectly decrease HIV acquisition risk among women [7, 8]. Male circumcision has also been associated with a reduced risk of acquiring other sexually transmitted infections such as syphilis, herpes simplex virus type 2, penile human papillomavirus, and cervical cancer [9-13]. Consequently, governments and international organizations began supporting efforts to enhance VMMC uptake [7, 14]. In 2016, the World Health Organization aimed to achieve an additional 25 million VMMCs among boys and men across 15 “high-priority” countries in eastern and southern Africa, including Uganda [15].

These efforts resulted in extensive VMMC uptake [6]. While less than 1.5 million VMMCs were recorded before 2012 in high priority countries, more than 26.8 million VMMCs were performed by 2019 [16]. However, uptake was less than needed to yield reductions in population-level HIV incidence [6]. Moreover, only about 50% of VMMCs in 2018 were conducted among men aged 15 years and up [16]. Thereafter, the World Health Organization emphasized increasing VMMC uptake rates within the general population in generalized HIV epidemic settings [17]. They also suggested targeting men at high risk of HIV acquisition and young men [17]. Subsequent data from 2020 indicated that about 75% of VMMCs in 2020 were among men aged 15 to 49 years with greater uptake among 15 to 24 year olds compared to other age groups [16].

The Ministry of Health in Uganda implemented a Safe Male Circumcision Policy in 2010 [18, 19]. The male circumcision prevalence among men aged 15 to 49 years increased from 26% in 2011 to 43% in 2016-2017 [18, 19]. Moreover, the total number of circumcised men increased by 36-fold from 2010 to 2019, with more than 5.8 million boys and men circumcised by 2020 [6]. However, the male circumcision prevalence in Uganda remains lower than in other high priority countries [20, 21]. Increasing VMMC uptake requires novel implementation strategies, especially those that do not stigmatize uncircumcised individuals. Prior studies have found that some communications about VMMC suggest that uncircumcised men are less masculine than ‘real men’, ‘dirtier’ than circumcised men, and/or less virile/able to perform sexually [22]. This kind of messaging stigmatizes men choosing not to get circumcised or who do not have access to circumcision services. Stigmatizing messaging is ineffective at best and potentially harmful at worst [23]. However, focusing on actual local health-promoting norms about male circumcision represents an understudied potential strategy for increasing VMMC uptake.

### Conceptual Framework

Theoretical and empirical research has shown that perceived descriptive norms – that is, what individuals think most other people do – influence individuals’ own behaviors and beliefs [24-34]. Yet, individuals often misperceive local norms. They tend to underestimate the prevalence of peers who engage in health-promoting behaviors [35-45] and overestimate peers’ engagement in health-risk behaviors [35-45]. Health-promoting behaviors may be invisible due to associated stigma, local taboos preventing conversation, or because they are relatively private. Norm

misperceptions arise due to lack of conversation or visible cues in the local environment about health-promoting behaviors, social media highlighting instances of high risk behavior, and biases in conversational, memory, and psychological inference processes [46, 47].

Altering perceived norms is an effective strategy for behavioral change [46-54]. Research across fields and topics has demonstrated that enhancing the salience and visibility of positive, health-promoting norms within local social networks or environments can shift individuals' expectations about typical and acceptable behavior and attitudes. Consequently, individuals who had misperceived a risk behavior as the norm are less likely to engage in or initiate such behavior [55-66]. Furthermore, they may be less permissive of risk behavior in others, less likely to spread norm misperceptions in conversation, and more inclined to support others' engagement in the desired behavior. This approach is particularly effective when individuals perceive information about local norms as recent, credible, and unaccompanied by contradictory or fear-based messaging [47, 49, 50]. Changing misperceived norms across a population can also influence collective attitudes and action [67]. Additionally, recent research has suggested that highlighting dynamic or trending norms, i.e., behaviors that are increasing in prevalence over time, can also promote behavioral change [68-71].

No studies have assessed perceived descriptive norms about male circumcision uptake in Uganda. Young uncircumcised men in eSwatini were more likely to report a personal intention to get circumcised if they thought that their friends, parents, or partner encouraged male circumcision and if they thought that most male friends were circumcised [72]. Similarly, young uncircumcised men in Zimbabwe were more likely to report a personal intention to get circumcised if they believed that their mother would encourage male circumcision and if they believed that male friends would get circumcised [73]. A recent systematic review concluded that familial and peer support for male circumcision facilitates uptake of VMMC [74]. Likewise, hearing about circumcision promotion from influential people such as religious leaders or a peer who underwent VMMC is also associated with circumcision uptake [75, 76].

Recent studies on HIV prevention, substance use, violence, and other health-related behaviors in Uganda and South Africa have found that individuals often overestimate the prevalence of community peers engaging in behaviors that increase the risk of HIV acquisition and transmission (e.g., avoiding testing, heavy substance use, condomless sex, intimate partner violence, and non-adherence to antiretroviral medication routines) [77-88]. Perceived norms about male circumcision in this context remain unexplored. Reducing HIV incidence in this setting necessitates greater VMMC adoption among men. Therefore, this study investigates men's and women's perceptions of the local male circumcision prevalence across eight villages in rural Uganda, comparing these perceptions to the actual circumcision prevalence among village men. Additionally, the study examines the relationship between perceptions and personal circumcision status among men aged 18 to 49 years. The findings will collectively indicate the potential for an opportunity to motivate VMMC uptake by addressing perceived norms, particularly in an HIV-endemic setting where numerous men in the general community are at high-risk for HIV acquisition.

## **METHODS**

## Study setting and design

We conducted a cross-sectional, whole-population study among all residents aged 18 years and older across eight villages in one rural, administrative parish in Rwampara District, southwestern Uganda. The study site was about 20 km from Mbarara City. The study team selected this parish in collaboration with local leaders, due to its tractable population and geographic size, and due to its similarity to other rural areas in Uganda where the majority of Ugandans reside [89]. Most households engage in an agriculture-based economy or small-scale trading/enterprise, household food and water insecurity are common, and access to electricity and piped water is rare [89-92]. These characteristics are similar to descriptions of other low-resource rural contexts in eastern and southern Africa. Moreover, this context is similar to rural areas in the 15 priority countries targeted for VMMC uptake in eastern and southern Africa.

## Study procedures

Research assistants who spoke the local language (Runyankore) gathered data in 2020-2022. All eligible individuals were invited to participate in this study if they were not incapacitated at the time of data collection. Using a continuously updated parish census list of eligible adult residents, research assistants contacted potential participants and asked them to participate in a study about health and wellbeing. During an informed consent process, research assistants obtained participants' signature or thumbprint (for those unable to write). Research assistants recorded responses to a close-ended interview survey using a computer-assisted tool. The survey questions were written in English, translated into Runyankore, and then back-translated to English to verify the translation's reliability. Question piloting and translation followed an iterative process. If procedures could not be conducted in person (typically around a participant's home) due to coronavirus-19 restrictions, then the research assistants conducted consent and data collection over the phone. Study participants received a kilogram of sugar or bar of soap (per local norms) for their time.

## Measures

One question elicited personal circumcision status from male participants. Response options included yes or no, though participants could also report don't know or refuse to answer. A second question elicited estimates of the male circumcision prevalence in one's own village (i.e., the perceived norm about male circumcision uptake) from both male and female participants. Specifically, each participant was asked how many men in their own village were circumcised, using a 5-point Likert-type scale ranging from 'all or almost all men (>90%)', 'more than half of men but fewer than 90%', 'fewer than half of men but more than 10%', and 'very few or no men (<10%)', and 'do not know'. Pre-testing suggested that participants easily understood 'Other adult men in your village' as a reference group. Therefore, that group was set as the social reference group for identifying local norms. Other studies conducted in this setting have used similar wording to capture perceptions about local norms [93, 94]. The perceived norm response categories are subsequently referred to as 'most', 'some', 'few', and 'don't know'.

## Additional covariates

Past research has found that male circumcision uptake varies by sociodemographic characteristics [20, 95-102], HIV testing history [76, 100, 101, 103], knowing one's HIV status [102], being HIV negative [102], and having condomless sex [95]. Thus, this study assessed several additional factors including perceived personal HIV risk/status (HIV-positive, no/low risk, medium/high risk (plus very few individuals with an unknown status)), having had condomless sex with a non-spouse sex partner in the past year, having had an STI in the past year, and having been tested for HIV in the past year. Sociodemographic variables included age, marital status (married/cohabiting versus divorced/separated/single), religion (Protestant, Catholic, Muslim, and Other), education (completed primary versus did not), household wealth quintile, and number of people in the household. To measure household wealth, we created a household asset index by conducting a principal components analysis on 26 separate variables representing household assets and housing characteristics (no missing data). We retained the first principal component to define the wealth index and then split it into quintiles [104, 105]. Finally, we created a variable representing whether any female household members thought that most men in their village were circumcised. We included this variable as a potential confounder between men's perceived norms and men's circumcision status given past work.

## Statistical analysis

We first calculated descriptive statistics of the population and the prevalence of male circumcision uptake among all men and among men <50 years old. Then we examined perceived norms about male circumcision uptake overall, among men, among women, and within subgroups across the population. For the subsample of men less than 50 years of age, we estimated the association between personally being circumcised and one's perception about the male circumcision norm in his community. We fitted modified Poisson regression models; with a binary dependent variable, the modified Poisson regression model has been shown to yield estimated incidence rate ratios that can be interpreted straightforwardly as relative risk ratios [106]. The model adjusted for HIV perceived risk and status, history of HIV testing, any STI in past year, condomless sex with nonspouse partner in past year, age, marital status, education, wealth, religion, number of household members, and whether any women in the household thought most village men had been circumcised. We also conducted a sensitivity analysis to assess the extent to which the findings might change with the inclusion of all men in the sample (i.e., including men 50 years of age and older and men who identified as Muslim). Analyses were conducted with Stata version 16 and accounted for clustering of observations by village [107].

## RESULTS

Among 1723 people who were eligible for study participation, 1,566 were interviewed (90.9% response rate). The mean age across the full population was 42 years (standard deviation [sd] = 16). Most participants [940 (60%)] had completed primary education or more, and most were married/cohabiting as if married [1024 (65%)]. Twenty-two participants (1%) identified as Muslim. Forty-five percent (n=698) were men. Among the 472 men who were < 50 years old, the average age was 34 years (sd = 8). In this subpopulation, 217 (49%) had been tested for HIV in the past year, 73 (16%) had condomless sex with a non-spouse partner in the past year, 32 (7%) reported having an HIV-positive status, and 55 (13%) reported medium or high perceived HIV risk.

## **The local prevalence of male circumcision**

Among all male participants, 660 out of 698 men reported their circumcision status. Among the 38 who did not, 21 men who had never had sex were accidentally not asked about their personal circumcision status due to a logic branching error during data collection and 17 other men simply did report their circumcision status. Among the 660 men with a reported circumcision status, 191 (27%) men reported that they were personally circumcised. This prevalence ranged from 23% to 37% across the eight villages. All men who identified as Muslim reported being personally circumcised.

Among 444 male participants under 50 years old who provided a response about their circumcision status, 167 (38%) reported that they were personally circumcised, which ranged from 27% to 51% across villages. The male circumcision prevalence was higher among younger age groups. For example, almost half of men aged 18-25 years old were circumcised (n=40[48%]). The prevalence was lower among men who had not completed primary school (Table 1).

## **Perceptions about the local male circumcision prevalence among adult men and women**

Across all participants, 275 (18%) thought that most men in their villages had been circumcised (including 10 participants who thought that almost all men had been circumcised); 631 (40%) thought that some men in their villages had been circumcised; 366 (23%) thought that few men in their villages had been circumcised; and, 287 (18%) reported that they did not know how many men in their villages had been circumcised.

The overall pattern of perceived norm about local male circumcision uptake was similar between men and women, though more women indicated a 'do not know' response (Figure 1). The perceived norm that few village men had been circumcised varied in prevalence from 10% to 35% across sex-specific sociodemographic and HIV risk categories (Supplemental Tables 1 and 2).

## **Perceived norms as correlates of personal circumcision status among men <50 years of age**

In the subset of men under 50 years of age and who did not identify as Muslim, we fitted a multivariable Poisson regression model specifying personal circumcision status as the dependent variable. Men who perceived that most men in their villages had been circumcised had a higher risk of having been circumcised than men who perceived that some men had been circumcised (adjusted relative risk [aRR] = 1.68; 95% CI, 1.22-2.30,  $p < 0.001$ ). Men who perceived that few men in their villages had been circumcised had a lower risk of having been circumcised (aRR = 0.51; 95% CI, 0.35-0.74,  $p < 0.001$ ). While the risk of having been circumcised appeared to decrease with age, estimates were not precisely estimated. Men who had finished primary education or more had a greater risk of having been circumcised, but the estimate was imprecise (aRR = 1.54; 95% CI, 0.98-2.42,  $p < 0.064$ ). None of the HIV risk factors nor any of the other sociodemographic factors were associated with participant circumcision status (Table 2). The predicted probabilities of being circumcised by perception categories are presented in Figure 2. Results from the sensitivity analysis including all men were similar (Supplemental Table 3).

## DISCUSSION

This population-based study across eight villages in rural Uganda found that 38% of men aged 18 to 49 were circumcised (and 27% overall). However, 27% of men and 21% of women underestimated the prevalence of circumcision among men in their villages. They incorrectly thought that few or no men were circumcised. Men who underestimated the prevalence of circumcision were less likely to be circumcised. These findings were robust and large in magnitude. Results about underestimating the prevalence of health-promoting behavior and the association between perceived norms and personal behavior are similar to findings from studies about other HIV-related issues such as HIV testing, adherence to antiretroviral therapy, condom use, and HIV-related stigma in this context and elsewhere in eastern and southern Africa [65, 77, 78, 81, 85].

Our results indicate the potential for employing a social norms approach to increase VMMC uptake in this context. This method, referred to as a ‘social norms approach’ [47], a ‘norms correction’ approach [108], or more broadly, a ‘norms-based’ approach, can be implemented by providing personalized normative feedback [109-112] about perceived versus actual circumcision rates to uncircumcised men and their partners who think few men are circumcised. A social norms campaign [56, 113, 114] emphasizing VMMC as a trending norm [71] in Uganda to the general population could serve as another strategy to correct underestimates and reinforce support for male circumcision uptake.

Addressing prevalence underestimates among uncircumcised men (i.e., correcting their state of false consensus [115]) may motivate them to undergo circumcision, either to conform with the growing trend or to seek ways to overcome barriers to getting circumcised. Increased awareness of the actual descriptive norm may also weaken negative beliefs about circumcision and encourage action on previous, unfulfilled intentions. Furthermore, rectifying prevalence underestimations among circumcised men (i.e., correcting their state of pluralistic ignorance [116]) may prompt them to share their experiences, realizing their behavior aligns with the trend. They might be more inclined to publically advocate for VMMC or support others in seeking options to do so. More information regarding the higher-than-expected and increasing circumcision prevalence could help mitigate stigmatizing beliefs or misconceptions, potentially arising from secrecy around the practice.

Correcting underestimates among women or a lack of information about male circumcision uptake and its upward trend may also promote male circumcision uptake. Mothers, sisters, and female partners often influence men’s circumcision decisions [72, 73, 117-120]. Changing their perceived norms may reduce personal stigmatizing attitudes toward male circumcision, increase conversation in support of circumcision, increase support for male partners to navigate any access barriers, and prevent spread of norm misperceptions. A qualitative study in Uganda found that pressure from female partners or wives to undergo circumcision also resulted in men undergoing VMMC [120]. Men reported that their partners believed in the importance of circumcision after hearing about it from radios, newspapers, and health services [120].

Examples of messages based on factual information rather than preferences, fantasies, or inaccurate beliefs include: “Recent data from your village indicates an increasing number of both



single and married men choosing circumcision. In 2011, one in ten men were circumcised in Uganda, while by 2021, more than one in three single men and one in three married men in this village were circumcised”, and “The number men choosing to get circumcised continues to grow. Now almost half of men aged 18 to 35 in your village. If you are interested in learning more, please let me know. Male circumcision services are available here”. Health care providers and community health workers could share this information during routine visits or as part of other HIV- or contraception- related interventions (e.g., HIV testing and counseling visits, peer counseling, financial incentive programs, SMS-based adherence support, or couples-based support programs [121-126]). Local leaders could receive training on trending norms information, promoting male circumcision visibility and salience through facilitated discussions or one-on-one conversations [75]. Visual representations of local norms could be displayed at the entrances of clinics offering VMMC services [127], or publicised through social norms marketing such as radio or edu-entertainment messages [48, 64]. Future research should evaluate the effectiveness of such norms-based strategies on perceived norms and VMMC uptake. Continuous monitoring and assessment are crucial to ensure messages do not communicate stigmatizing attitudes or cause unintended consequences.

This study has limitations. First, because the data represent a single rural parish, findings may not generalize to the national population or to other countries. However, they do represent the entire parish population, and the study context is similar to rural areas across Uganda and in eastern and southern Africa. Thus, the findings provide a foundation for conducting research on perceptions about male circumcision norms in similar contexts where the prevalence of male circumcision has increased since initial WHO recommendations. Second, circumcision status is based on self-report. However, under-reporting and over-reporting of this behavior are likely to cancel each other out. Moreover, the slightly larger prevalence of circumcision among men 18 to < 50 years old in this parish in 2020-2022 (i.e., 30%) compared to the prevalence of circumcision among men aged 15 to < 50 years old in southwest Uganda in 2016 (i.e., 26%) [128] makes logical sense given the increasing male circumcision trend. Finally, the data are cross-sectional and we do not make claims of causality. Rather, we highlight opportunities where altering perceived norms about male circumcision by increasing the visibility of an actual upward trend might motivate subsequent behavior around VMMC uptake. Prior research has shown this type of norms-based strategy to be effective method of behavior change.

## CONCLUSION

In this population-based study in rural Uganda, approximately one in four adults underestimated the prevalence of male circumcision within their village. These perceptions were significant, as men’s underestimation of the circumcision prevalence was associated with a lower chance of being circumcised. A novel opportunity exists to promote VMMC uptake in HIV-endemic settings through a norms-based approach. Male circumcision in Uganda has trended upward since 2011. Providing information about the rising trend in male circumcision rates in this context and correcting prevalence underestimates will enhance VMMC uptake visibility and salience. This norms-based strategy to promote VMMC uptake could complement efforts to educate individuals about circumcision and its health benefits.

### **Authors' Contributions**

JMP conceptualized and designed the study. JMP and SJ wrote the first draft. BK, CB, VK, MJ, ENS, SA, and ACT supported data collection. JMP and RD conducted data analysis. All authors contributed to critical revisions and approved the final manuscript.

### **Acknowledgements**

We thank the HopeNet cohort study participants, without whom this research would not be possible. We also thank members of the HopeNet study team for research assistance; in addition to the named study authors, HopeNet team members who contributed to data collection and/or study administration during all or any part of the study were as follows: Phionah Ahereza, Dickson Beinomugisha, Patrick Gumisiriza, Justus Kananura, Allen Kiconco, Michael Matte, Patrick Lukwago Muleke, and Elizabeth Namara. We also thank Roger Hofmann of West Portal Software Corporation (San Francisco, CA, USA), for developing and customizing the Computer Assisted Survey Information Collection Builder software program used to collect the survey data.

**Funding** This study was funded by U.S. National Institutes of Health (NIH) R01MH113494. JMP acknowledges salary support from NIH K01MH115811. ABC acknowledges salary support from K01HD105521.

### **Data Available**

Data and code for analysis are available from the corresponding author upon reasonable request.

### **Ethics approval**

Ethical approval was granted by the Mass General Brigham Institutional Review Board, the Research Ethics Committee at Mbarara University of Science and Technology, and the Vanderbilt Human Research Protections Program. We also received clearance from the Uganda National Council of Science and Technology and the Research Secretariat in the Office of the President of the Republic of Uganda. The analyses were not pre-registered; therefore, the results should be considered exploratory.

## REFERENCES

1. WHO. New Data on Male Circumcision and HIV Prevention: Policy and Programme Implications. Geneva2007.
2. Auvert B, Taljaard D, Lagarde E, et al. Randomized, controlled intervention trial of male circumcision for reduction of HIV infection risk: The ANRS 1265 Trial. *PLoS Med*. 2005;2(11):e298.
3. Bailey RC, Moses S, Parker CB, et al. Male circumcision for HIV prevention in young men in Kisumu, Kenya: a randomised controlled trial. *Lancet*. 2007;369(9562):643-56.
4. Gray RH, Kigozi G, Serwadda D, et al. Male circumcision for HIV prevention in men in Rakai, Uganda: a randomised trial. *Lancet*. 2007;369(9562):657-66.
5. UNAIDS. Voluntary medical male circumcision—4.1 million performed in 2018: UNAIDS; 2019. Available from: [https://www.unaids.org/en/resources/presscentre/featurestories/2019/october/20191021\\_vmmc](https://www.unaids.org/en/resources/presscentre/featurestories/2019/october/20191021_vmmc).
6. WHO, UNAIDS. Progress Brief: Voluntary Medical Male Circumcision. Geneva2021.
7. PEPFAR. PEPFAR's Best Practices for Voluntary Medical Male Circumcision Site Operations U.S. President's Emergency Plan for AIDS Relief
8. Njeuhmeli E, Forsythe S, Reed J, et al. Voluntary medical male circumcision: Modeling the impact and cost of expanding male circumcision for HIV prevention in Eastern and Southern Africa. *PLoS Med*. 2011;8(11):e1001132.
9. Moodley J, Naidoo S, Kelly C, et al. The impact of male partner circumcision on women's health outcomes. *AIDS Educ Prev*. 2020;32(4):356-66.
10. Weiss HA, Thomas SL, Munabi SK, et al. Male circumcision and risk of syphilis, chancroid, and genital herpes: a systematic review and meta-analysis. *Sexually Transmitted Infections*. 2006;82(2):101.
11. Tobian AAR, Serwadda D, Quinn TC, et al. Male circumcision for the prevention of HSV-2 and HPV infections and syphilis. *N Engl J Med*. 2009;360(13):1298-309.
12. Castellsagué X, Bosch FX, Muñoz N, et al. Male Circumcision, Penile Human Papillomavirus Infection, and Cervical Cancer in Female Partners. *N Engl J Med*. 2002;346(15):1105-12.
13. Morris BJ, Hankins CA. Effect of male circumcision on risk of sexually transmitted infections and cervical cancer in women. *Lancet Glob Health*. 2017;5(11):e1054-e5.
14. Reed JB, Njeuhmeli E, Thomas AG, et al. Voluntary medical male circumcision: An HIV prevention priority for PEPFAR. *JAIDS Journal of Acquired Immune Deficiency Syndromes*. 2012;60.
15. UN. Political Declaration on HIV and AIDS: On the Fast Track to Accelerating the Fight against HIV and to Ending the AIDS Epidemic by 2030. United Nations; 2016.
16. UNAIDS. UNAIDS Data 2021. Geneva: UNAIDS Joint United Nations Programme on HIV/AIDS 2021.
17. WHO. Preventing HIV through safe voluntary medical male circumcision for adolescent boys and men in generalized HIV epidemics: recommendations and key considerations. Geneva2020.

18. Byabagambi J, Marks P, Megere H, et al. Improving the quality of voluntary medical male circumcision through use of the continuous quality improvement approach: A pilot in 30 PEPFAR-supported sites in Uganda. *PLoS One*. 2015;10(7):e0133369.
19. Uganda Ministry of Health. Safe Male Circumcision Policy. 2010.
20. Uganda Ministry of Health. Uganda Population-Based HIV Impact Assessment (UPHIA) 2016-2017: Final Report. Kampala: Uganda Ministry of Health; 2019.
21. Bershteyn A, Mudimu E, Platais I, et al. Understanding the evolving role of voluntary medical male circumcision as a public health strategy in Eastern and Southern Africa: Opportunities and challenges. *Curr HIV/AIDS Rep*. 2022;19(6):526-36.
22. Rennie S, Gilbertson A, Hallfors D, et al. The Ethics of Stigma in Medical Male Circumcision Initiatives Involving Adolescents in Sub-Saharan Africa. *Public Health Ethics*. 2021;14(1):79-89.
23. Brewis A, Wutich A. *Lazy, crazy, and disgusting: stigma and the undoing of global health*: Johns Hopkins University Press; 2019.
24. Sherif M. *The psychology of social norms*. New York: Harper; 1936.
25. Asch SE. Studies of independence and conformity: a minority of one against a unanimous majority. *Psychol Monogr Gen Appl*. 1956;70(9):1-70.
26. Cialdini RB, Trost MR. Social influence: social norms, conformity and compliance. In: Gilbert DT, Fiske ST, Lindzey G, editors. *The Handbook of Social Psychology*. Vol. 1 and 2. 4th ed. New York: McGraw-Hill; 1998. p. 151-92.
27. Brechwald WA, Prinstein MJ. Beyond homophily: a decade of advances in understanding peer influence processes. *J Res Adolesc*. 2011;21(1):166-79.
28. Reid AE, Cialdini RB, Aiken LS. Social norms and health behavior. In: Steptoe A, editor. *Handbook of Behavioral Medicine: Methods and Applications*. New York. NY: Springer; 2010. p. 263-74.
29. Perkins HW, Berkowitz AD. Perceiving the community norms of alcohol use among students: some research implications for campus alcohol education programming. *Int J Addict*. 1986;21(9-10):961-76.
30. Cialdini RB, Reno RR, Kallgren CA. A focus theory of normative conduct: recycling the concept of norms to reduce littering in public places. *J Pers Soc Psychol*. 1990;58(6):1015-26.
31. Ajzen I. The theory of planned behavior. *Organ Behav Hum Decis Process*. 1991;50(2):179-211.
32. Montaña DE, Kasprzyk D. Theory of reasoned action, theory of planned behavior, and the integrated behavior model. In: Glanz K, Rimer BK, Viswanath K, editors. *Health Behavior and Health Education: Theory, Research, and Practice*. 4 ed. San Francisco, CA, US: John Wiley & Sons; 2008.
33. Lapinski MK, Rimal RN. An explication of social norms. *Commun Theory*. 2005;15(2):127-47.
34. Rimal RN, Yilma H. Descriptive, injunctive, and collective norms: An expansion of the Theory of Normative Social Behavior (TNSB). *Health Commun*. 2021:1-8.
35. Perkins HW. Scope of the problem: misperceptions of alcohol and drugs. *Catalyst*. 1995;1(3):1-2.
36. Perkins HW, Wechsler H. Variation in perceived college drinking norms and its impact on alcohol abuse: a nationwide study. *Journal of Drug Issues*. 1996;26(4):961-74.

37. Perkins HW. College student misperceptions of alcohol and other drug norms among peers: exploring causes, consequences, and implications for prevention programs. Designing alcohol and other drug prevention programs in higher education: bringing theory into practice. Newton, MA: Higher Education Center for Alcohol and Other Drug Prevention; 1997. p. 177-206.
38. Perkins HW, Meilman PW, Leichter JS, et al. Misperceptions of the norms for the frequency of alcohol and other drug use on college campuses. *J Am Coll Health Assoc.* 1999;47(6):253-8.
39. Perkins HW. The imaginary lives of peers: patterns of substance use and misperceptions of norms among secondary school students. In: Perkins HW, editor. *The Social Norms Approach to Preventing School and College Age Substance Abuse: A Handbook for Educators, Counselors, and Clinicians.* San Francisco, CA: Jossey-Bass; 2003.
40. Perkins HW, Haines MP, Rice R. Misperceiving the college drinking norm and related problems: a nationwide study of exposure to prevention information, perceived norms and student alcohol misuse. *J Stud Alcohol Drugs.* 2005;66(4):470-8.
41. Perkins HW. Misperceptions of peer drinking norms in Canada: another look at the "reign of error" and its consequences among college students. *Addict Behav.* 2007;32(11):2645-56.
42. Perkins JM, Perkins HW, Craig DW. Misperceptions of peer norms as a risk factor for sugar-sweetened beverage consumption among secondary school students. *Journal of the American Dietetic Association.* 2010;110(12):1916-21.
43. Perkins HW. Misperceptions of peer substance use among youth are real. *Addiction.* 2012;107(5):885-6.
44. Perkins HW, Craig DW. Student-athletes' misperceptions of male and female peer drinking norms: a multi-site investigation of the "Reign of Error". *J Coll Stud Dev.* 2012;53(3):367-82.
45. Perkins HW. Misperception is reality: the "Reign of Error" about peer risk behaviour norms among youth and young adults. In: Xenitidou M, Edmonds B, editors. *The Complexity of Social Norms.* New York: Springer; 2014. p. 11-36.
46. Prentice DA. Intervening to change social norms: when does it work? *Social Research: An International Quarterly.* 2018;85(1):115-39.
47. Perkins HW, editor. *The social norms approach to preventing school and college age substance abuse: A handbook for educators, counselors, and clinicians.* San Francisco: Jossey-Bass; 2003.
48. Miller DT, Prentice DA. Changing norms to change behavior. *Annu Rev Psychol.* 2016;67:339-61.
49. Dempsey RC, McAlaney J, Bewick BM. A critical appraisal of the social norms approach as an interventional strategy for health-related behavior and attitude change. *Front Psychol.* 2018;9:1-16.
50. Perkins H, Craig DW. *A multifaceted social norms approach to reduce high-risk drinking: lessons from Hobart and William Smith Colleges.* Newton, MA: The Higher Education Center for Alcohol and Other Drug Prevention and the U.S. Department of Education; 2002.

51. Haines MP, Perkins HW, Rice RM, et al. A guide to marketing social norms for health promotion in schools and communities. Dekalb, IL: National Social Norms Resource Center; 2005.
52. Bicchieri C, Dimant E. Nudging with care: the risks and benefits of social information. *Public Choice*. 2022;191(3):443-64.
53. Tankard ME, Paluck EL. Norm perception as a vehicle for social change. *Soc Issues Policy Rev*. 2016;10(1):181-211.
54. Constantino SM, Sparkman G, Kraft-Todd GT, et al. Scaling Up Change: A Critical Review and Practical Guide to Harnessing Social Norms for Climate Action. *Psychological Science in the Public Interest*. 2022;23(2):50-97.
55. Perkins HW, Craig DW, Perkins JM. Using social norms to reduce bullying: a research intervention among adolescents in five middle schools. *Group Process Intergroup Relat*. 2011;14(5):703-22.
56. Perkins HW, Perkins JM. The Social Norms Approach: Confronting the “reign of error” as a successful strategy to reduce harmful drinking and drug use in college. In: Anderson D, Hall T, editors. *Leading Campus Drug and Alcohol Abuse Prevention: Grounded Approaches for Student Impact*. Washington, DC: National Association of Student Personnel Administrators; 2021. p. pp. 159-62 & pp. 417-24.
57. Perkins HW, Perkins JM. Using the social norms approach to promote health and reduce risk among college students. In: Cimini MD, Rivero EM, editors. *Promoting behavioral health and reducing risk among college students*. New York: Routledge; 2018. p. 127-44.
58. Hallsworth M, Chadborn T, Sallis A, et al. Provision of social norm feedback to high prescribers of antibiotics in general practice: a pragmatic national randomised controlled trial. *Lancet*. 2016;387(10029):1743-52.
59. Hallsworth M, List JA, Metcalfe RD, et al. The behaviorist as tax collector: using natural field experiments to enhance tax compliance. *J Public Econ*. 2017;148:14-31.
60. Bursztyn L, González AL, Yanagizawa-Drott D. Misperceived social norms: women working outside the home in Saudi Arabia. *Am Econ Rev*. 2020;110(10):2997-3029.
61. Cialdini RB, Jacobson RP. Influences of social norms on climate change-related behaviors. *Current Opinion in Behavioral Sciences*. 2021;42:1-8.
62. Bicchieri C, Das U, Gant S, et al. Examining norms and social expectations surrounding exclusive breastfeeding: Evidence from Mali. *World Development*. 2022;153:105824.
63. Silk KJ, Perrault EK, Nazione SA, et al. Evaluation of a social norms approach to a suicide prevention campaign. *J Health Commun*. 2017;22(2):135-42.
64. Berkowitz AD, Bogen KW, Lopez RJM, et al. The social norms approach as a strategy to prevent violence perpetrated by men and boys: a review of the literature. In: Orchowski LM, Berkowitz A, editors. *Engaging Boys and Men in Sexual Assault Prevention*: Academic Press; 2021. p. 1-67.
65. Yu H. Social stigma as a barrier to HIV testing: Evidence from a randomized experiment in Mozambique. *Journal of Development Economics*. 2023;161:103035.
66. Gauri V, Rahman T, Sen IK. Shifting social norms to reduce open defecation in rural India. *Behav Public Policy*. 2023;7(2):266-90.
67. Prentice DA, Paluck EL. Engineering social change using social norms: lessons from the study of collective action. *Curr Opin Psychol*. 2020;35:138-42.

68. Graupensperger S, Lee CM, Larimer ME. Leveraging dynamic norms to reduce alcohol use among college students: A proof-of-concept experimental study. *Alcohol Clin Exp Res.* 2021;45(11):2370-82.
69. Sparkman G, Walton GM. Dynamic norms promote sustainable behavior, even if it is counternormative. *Psychol Sci.* 2017;28(11):1663-74.
70. Mortensen CR, Neel R, Cialdini RB, et al. Trending Norms: A Lever for Encouraging Behaviors Performed by the Minority. *Social Psychological and Personality Science.* 2017;10(2):201-10.
71. Mortensen CR, Neel R, Cialdini RB, et al. Trending norms: a lever for encouraging behaviors performed by the minority. *Social Psychological and Personality Science.* 2019;10(2):201-10.
72. Gurman TA, Dhillon P, Greene JL, et al. Informing the scaling up of voluntary medical male circumcision efforts through the use of Theory of Reasoned Action: Survey findings among uncircumcised young men in Swaziland. *AIDS Educ Prev.* 2015;27(2):153-66.
73. Montaña DE, Kasprzyk D, Hamilton DT, et al. Evidence-based identification of key beliefs explaining adult male circumcision motivation in Zimbabwe: Targets for behavior change messaging. *AIDS Behav.* 2014;18(5):885-904.
74. Carrasco MA, Wilkinson J, Kasdan B, et al. Systematic review of barriers and facilitators to voluntary medical male circumcision in priority countries and programmatic implications for service uptake. *Glob Public Health.* 2019;14(1):91-111.
75. Downs JA, Mwakisole AH, Chandika AB, et al. Educating religious leaders to promote uptake of male circumcision in Tanzania: a cluster randomised trial. *Lancet.* 2017;389(10074):1124-32.
76. Montague C, Ngcobo N, Mahlase G, et al. Implementation of adolescent-friendly voluntary medical male circumcision using a school based recruitment program in rural KwaZulu-Natal, South Africa. *PLoS One.* 2014;9(5):e96468.
77. Perkins JM, Kakuhikire B, Baguma C, et al. Perceptions about local ART adherence norms and personal adherence behavior among adults living with HIV in rural Uganda. *AIDS Behav.* 2022;26(6):1892-904.
78. Perkins JM, Nyakato VN, Kakuhikire B, et al. Actual versus perceived HIV testing norms, and personal HIV testing uptake: a cross-sectional, population-based study in rural Uganda. *AIDS Behav.* 2018;22(2):616-28.
79. Perkins JM, Kakuhikire B, Baguma C, et al. Overestimation of alcohol consumption norms as a driver of alcohol consumption: a whole-population network study of men across eight villages in rural, southwestern Uganda. *Addiction.* 2022;117(1):68-81.
80. Perkins JM, Krezanoski P, Takada S, et al. Social norms, misperceptions, and mosquito net use: a population-based, cross-sectional study in rural Uganda. *Malar J.* 2019;18(1):1-13.
81. Tsai AC, Kakuhikire B, Perkins JM, et al. Normative vs personal attitudes toward persons with HIV, and the mediating role of perceived HIV stigma in rural Uganda. *J Glob Health.* 2021;11:04056.
82. Tsai AC, Kakuhikire B, Perkins JM, et al. Measuring personal beliefs and perceived norms about intimate partner violence: population-based survey experiment in rural Uganda. *PLoS Med.* 2017;14(5):e1002303.

83. Perkins JM, Kakuhikire B, Baguma C, et al. Perceived and misperceived norms about khat and/or cannabis use among adults in southwest Uganda. *Int J Drug Policy*. 2022;101:103527.
84. Green DP, Wilke AM, Cooper J. Countering violence against women by encouraging disclosure: a mass media experiment in rural Uganda. *Comp Pol Stud*. 2020;53(14):2283-320.
85. Carey KB, Scott-Sheldon LAJ, Carey MP, et al. Community norms for HIV risk behaviors among men in a South African township. *J Behav Med*. 2011;34(1):32-40.
86. Ganz G, Neville FG, Ward CL. Applying behavioural science to issues of public health in South Africa: the case for social norms intervention. *S Afr J Sci*. 2017;113:1-5.
87. Ganz G, Neville FG, Kassarjee R, et al. Parental misperceptions of in-group norms for child discipline. *J Community Appl Soc Psychol*. 2020;30:628– 44.
88. Steyl T, Phillips J. Actual and perceived substance use of health science students at a university in the Western Cape, South Africa. *Afr Health Sci*. 2011;11(3):329-33.
89. Uganda Bureau of Statistics (UBOS), ICF. Uganda Demographic and Health Survey 2016. Kampala, Uganda and Rockville, Maryland, USA: UBOS and ICF; 2018.
90. Perkins JM, Nyakato VN, Kakuhikire B, et al. Food insecurity, social networks, and symptoms of depression among men and women in rural Uganda: a cross-sectional, population-based study. *Public Health Nutr*. 2018;21(5):838-48.
91. Mushavi RC, Burns BFO, Kakuhikire B, et al. “When you have no water, it means you have no peace”: A mixed-methods, whole-population study of water insecurity and depression in rural Uganda. *Soc Sci Med*. 2020;245:112561.
92. Tsai AC, Kakuhikire B, Mushavi R, et al. Population-based study of intra-household gender differences in water insecurity: reliability and validity of a survey instrument for use in rural Uganda. *J Water Health*. 2016;14(2):280-92.
93. Shibutani T. Reference groups as perspectives. *Am J Sociol*. 1955;60(6):562-9.
94. Sherif M. The concept of reference groups in human relations. *Group relations at the crossroads*. Oxford, England: Harper; 1953. p. 203-31.
95. Rosen JG, Carrasco MA, Traub AM, et al. Barriers, benefits, and behaviour: Voluntary medical male circumcision ideation in a population-based sample of Zambian men. *Afr J AIDS Res*. 2021;20(4):314-23.
96. Masese R, Mwalabu G, Petrucka P, et al. Key challenges to voluntary medical male circumcision uptake in traditionally circumcising settings of Machinga district in Malawi. *BMC Public Health*. 2021;21(1):1957.
97. Tram KH, Bertrand JT. Correlates of male circumcision in Eastern and Southern African countries: establishing a baseline prior to VMMC scale-up. *PLoS One*. 2014;9(6):e100775.
98. Spees LP, Ledikwe JH, Kleinman NJ, et al. Immediate motivators to seeking voluntary medical male circumcision among HIV-negative adult men in an urban setting in Botswana. *AIDS Educ Prev*. 2019;31(2):136-51.
99. Tusa BS, Weldesenbet AB, Tefera TK, et al. Spatial distribution of traditional male circumcision and associated factors in Ethiopia; using multilevel generalized linear mixed effects model. *BMC Public Health*. 2021;21(1):1423.
100. Carrasco MA, Rosen JG, Maile L, et al. Medically, traditionally, and dually circumcised men in Lesotho: Population-based measurements of HIV/STI infections, sexual risk behaviors, and service use patterns. *AIDS Behav*. 2020;24(7):2112-8.



101. Edossa ZK, Kumsa AT, Gebre MN. Male circumcision uptake and its predictors among sexually active men aged 15–59 years living in the highest HIV prevalence region of Ethiopia: evidence from 2016 Ethiopia demographic and health survey. *BMC Public Health*. 2020;20(1):1772.
102. Ortblad KF, Bärnighausen T, Chimbindi N, et al. Predictors of male circumcision incidence in a traditionally non-circumcising South African population-based cohort. *PLoS One*. 2018;13(12):e0209172.
103. Mwiinga K. Male circumcision in Lusaka, Zambia: Evidence from the Zambia Demographic and Health Survey. *Southern African Journal of Demography*. 2020;20(1):1-31.
104. Filmer D, Pritchett LH. Estimating wealth effects without expenditure data—or tears: an application to educational enrollments in states of India. *Demography*. 2001;38(1):115-32.
105. Smith ML, Kakuhikire B, Baguma C, et al. Do household asset wealth measurements depend on who is surveyed? Asset reporting concordance within multi-adult households in rural Uganda. *J Glob Health*. 2020;10(1):010412.
106. Zou G. A modified poisson regression approach to prospective studies with binary data. *Am J Epidemiol*. 2004;159(7):702-6.
107. StataCorp. *Stata Statistical Software: Release 16*. College Station, TX: StataCorp LLC; 2019.
108. Cislighi B, Berkowitz AD. The evolution of social norms interventions for health promotion: Distinguishing norms correction and norms transformation. *J Glob Health*. 2021;21(11):03065.
109. Lewis MA, Neighbors C. Optimizing personalized normative feedback: the use of gender-specific referents. *J Stud Alcohol Drugs*. 2007;68(2):228-37.
110. Labrie JW, Lewis MA, Atkins DC, et al. RCT of web-based personalized normative feedback for college drinking prevention: Are typical student norms good enough? *J Consult Clin Psychol*. 2013;81(6):1074-86.
111. Neighbors C, Rodriguez LM, Rinker DV, et al. Efficacy of personalized normative feedback as a brief intervention. *J Consult Clin Psychol*. 2015;83(3):500-11.
112. Lewis MA, Neighbors C. Social norms approaches using descriptive drinking norms education: a review of the research on personalized normative feedback. *J Am Coll Health*. 2006;54(4):213-8.
113. Linkenbach JW, Perkins HW. Most of us are tobacco free: an eight-month social norms campaign reducing youth initiation of smoking in Montana. In: Perkins HW, editor. *The Social Norms Approach to Preventing School and College Age Substance Abuse: A Handbook for Educators, Counselors, and Clinicians*. San Francisco, CA: Jossey-Bass; 2003.
114. Perkins HW, Craig DW. A successful social norms campaign to reduce alcohol misuse among college student-athletes. *J Stud Alcohol Drugs*. 2006;67(6):880-9.
115. Ross L, Greene D, House P. The “false consensus effect”: An egocentric bias in social perception and attribution processes. *Journal of Experimental Social Psychology*. 1977;13(3):279-301.
116. Prentice DA, Miller DT. Pluralistic ignorance and alcohol use on campus: some consequences of misperceiving the social norm. *J Pers Soc Psychol*. 1993;64(2):243-56.

117. Lanham M, L'Engle KL, Loolpapit M, et al. Women's roles in voluntary medical male circumcision in Nyanza Province, Kenya. *PLoS One*. 2012;7(9):e44825.
118. Price JE, Phiri L, Mulenga D, et al. Behavior change pathways to voluntary medical male circumcision: Narrative interviews with circumcision clients in Zambia. *PLoS One*. 2014;9(11):e111602.
119. Osaki H, Mshana G, Wambura M, et al. "If you are not circumcised, I cannot say yes": The role of women in promoting the uptake of voluntary medical male circumcision in Tanzania. *PLoS One*. 2015;10(9):e0139009.
120. Muhamadi L, Ibrahim M, Wabwire-Mangen F, et al. Perceived medical benefit, peer/partner influence and safety and cost to access the service: client motivators for voluntary seeking of medical male circumcision in Iganga district eastern Uganda, a qualitative study. *Pan African Medical Journal*. 2013;15(1).
121. Bassett IV, Wilson D, Taaffe J, et al. Financial incentives to improve progression through the HIV treatment cascade. *Curr Opin HIV AIDS*. 2015;10(6):451-63.
122. Remien RH, Stirratt MJ, Dolezal C, et al. Couple-focused support to improve HIV medication adherence: a randomized controlled trial. *AIDS*. 2005;19(8):807-14.
123. Haberer JE, Musiimenta A, Atukunda EC, et al. Short message service (SMS) reminders and real-time adherence monitoring improve antiretroviral therapy adherence in rural Uganda. *AIDS*. 2016;30(8):1295-9.
124. MacCarthy S, Mendoza-Graf A, Saya U, et al. Lessons learned from a mobile technology-based intervention informed by behavioral economics to improve ART adherence among youth in Uganda. *AIDS Care*. 2020;32(5):616-22.
125. Haberer JE, Sabin L, Amico KR, et al. Improving antiretroviral therapy adherence in resource-limited settings at scale: a discussion of interventions and recommendations. *J Int AIDS Soc*. 2017;20(1):1-15.
126. MacCarthy S, Wagner Z, Mendoza-Graf A, et al. A randomized controlled trial study of the acceptability, feasibility, and preliminary impact of SITA (SMS as an Incentive To Adhere): a mobile technology-based intervention informed by behavioral economics to improve ART adherence among youth in Uganda. *BMC Infect Dis*. 2020;20(1):173.
127. McCoy SI, Fahey C, Rao A, et al. Pilot study of a multi-pronged intervention using social norms and priming to improve adherence to antiretroviral therapy and retention in care among adults living with HIV in Tanzania. *PLoS One*. 2017;12(5):e0177394.
128. Uganda Bureau of Statistics - UBOS and ICF. Uganda Demographic and Health Survey 2016. Kampala, Uganda: UBOS and ICF; 2018.

Table 1. Distribution of male study participants < 50 years old and the prevalence of male circumcision based on personal reports from all male residents aged 18 to <50 years old across eight villages in Rwampara District, southwest Uganda.

|                                                                                            | N and percent of men less than 50 years old who reported their circumcision status <sup>a</sup> |      | n and percent of these men who reported being circumcised |      |
|--------------------------------------------------------------------------------------------|-------------------------------------------------------------------------------------------------|------|-----------------------------------------------------------|------|
| Total                                                                                      | 444                                                                                             | 100% | 167                                                       | 38%  |
| Age (years)                                                                                |                                                                                                 |      |                                                           |      |
| 18-25 years old                                                                            | 84                                                                                              | 19%  | 40                                                        | 48%  |
| 26-35 years old                                                                            | 160                                                                                             | 36%  | 64                                                        | 40%  |
| 36-45 years old                                                                            | 152                                                                                             | 34%  | 49                                                        | 32%  |
| 46-55 years old                                                                            | 48                                                                                              | 11%  | 14                                                        | 29%  |
| Marital status                                                                             |                                                                                                 |      |                                                           |      |
| Not married                                                                                | 147                                                                                             | 33%  | 57                                                        | 39%  |
| Married / cohabiting as if married                                                         | 297                                                                                             | 67%  | 110                                                       | 37%  |
| Religion                                                                                   |                                                                                                 |      |                                                           |      |
| Catholic                                                                                   | 93                                                                                              | 21%  | 40                                                        | 43%  |
| Muslim                                                                                     | 7                                                                                               | 2%   | 7                                                         | 100% |
| Protestant                                                                                 | 321                                                                                             | 72%  | 110                                                       | 34%  |
| Other (not religious, seventh day adventist)                                               | 23                                                                                              | 5%   | 10                                                        | 43%  |
| Education                                                                                  |                                                                                                 |      |                                                           |      |
| Less than primary education                                                                | 112                                                                                             | 25%  | 27                                                        | 24%  |
| Completed primary education                                                                | 332                                                                                             | 75%  | 140                                                       | 42%  |
| Household asset wealth                                                                     |                                                                                                 |      |                                                           |      |
| 1st (poorest)                                                                              | 83                                                                                              | 19%  | 28                                                        | 34%  |
| 2nd                                                                                        | 99                                                                                              | 22%  | 36                                                        | 36%  |
| 3rd                                                                                        | 90                                                                                              | 20%  | 34                                                        | 38%  |
| 4th                                                                                        | 87                                                                                              | 20%  | 31                                                        | 36%  |
| 5th (least poor)                                                                           | 85                                                                                              | 19%  | 38                                                        | 45%  |
| Lived with at least one woman who thought that >50% of men in village had been circumcised |                                                                                                 |      |                                                           |      |
| No                                                                                         | 359                                                                                             | 81%  | 132                                                       | 37%  |
| Yes                                                                                        | 85                                                                                              | 19%  | 35                                                        | 41%  |
| Was tested for HIV in past 12 months                                                       |                                                                                                 |      |                                                           |      |
| No                                                                                         | 227                                                                                             | 51%  | 74                                                        | 33%  |
| Yes                                                                                        | 217                                                                                             | 49%  | 93                                                        | 43%  |
| Had an STI in past 12 months                                                               |                                                                                                 |      |                                                           |      |

|                                                                |     |     |     |     |
|----------------------------------------------------------------|-----|-----|-----|-----|
| No                                                             | 411 | 93% | 153 | 37% |
| Yes                                                            | 33  | 7%  | 14  | 42% |
| Had condomless sex with a non-spouse partner in past 12 months |     |     |     |     |
| No                                                             | 371 | 84% | 136 | 37% |
| Yes                                                            | 73  | 16% | 31  | 42% |
| Perceived personal HIV risk                                    |     |     |     |     |
| HIV-positive                                                   | 32  | 7%  | 9   | 28% |
| No/low risk                                                    | 353 | 80% | 137 | 39% |
| Medium/high risk                                               | 55  | 13% | 20  | 36% |

---

<sup>a</sup>Circumcision status for 28 participants was unknown: 9 refused to answer and 19 were accidentally not asked the question after indicating that they had never had sex. They are not included in this table.

Table 2. Modified multivariable Poisson regression model estimating associations between the perceived norm about circumcision status among men in one's village and being personally circumcised among almost all resident adult men <50 years old (excluding Muslim men) across eight villages in Rwampara District, southwestern Uganda (n=433 men).

|                                                                                                     | Yes, circumcised |               |         |
|-----------------------------------------------------------------------------------------------------|------------------|---------------|---------|
|                                                                                                     | aRR              | (95% CI)      | p-value |
| Perceived norm about male circumcision uptake in own village                                        |                  |               |         |
| Most men are circumcised (i.e., >50%)                                                               | 1.68             | (1.25 – 2.27) | 0.001   |
| Some men are circumcised (i.e., 10% to <50%)                                                        | REF              | -             | -       |
| Few men are circumcised (i.e., 0 to <10%)                                                           | 0.51             | (0.35 – 0.74) | <0.001  |
| Don't know how many men are circumcised                                                             | 0.59             | (0.33 – 1.06) | 0.079   |
| Age (years)                                                                                         |                  |               |         |
| 18-25                                                                                               | REF              | -             | -       |
| 26-35                                                                                               | 0.91             | (0.69 – 1.22) | 0.536   |
| 36-45                                                                                               | 0.81             | (0.63 – 1.04) | 0.105   |
| 46-55                                                                                               | 0.72             | (0.44 – 1.19) | 0.202   |
| Married / cohabiting (vs. other)                                                                    | 1.17             | (0.91 – 1.50) | 0.216   |
| Religion                                                                                            |                  |               |         |
| Catholic                                                                                            | REF              |               |         |
| Protestant                                                                                          | 0.85             | (0.60 – 1.21) | 0.372   |
| Other                                                                                               | 1.10             | (0.63 – 1.90) | 0.743   |
| Completed primary education or more (vs. did not)                                                   | 1.54             | (0.98 – 2.42) | 0.064   |
| Household asset quintile                                                                            |                  |               |         |
| 1st quintile (poorest)                                                                              | REF              | -             | -       |
| 2nd quintile                                                                                        | 0.96             | (0.73 – 1.26) | 0.762   |
| 3rd quintile                                                                                        | 0.88             | (0.51 – 1.52) | 0.650   |
| 4th quintile                                                                                        | 0.86             | (0.57 – 1.28) | 0.449   |
| 5th quintile (least poor)                                                                           | 1.18             | (0.77 – 1.80) | 0.451   |
| Lived with at least one woman who thought >50% of men in village had been circumcised (vs. did not) | 1.06             | (0.68 – 1.68) | 0.786   |
| Tested for HIV in past 12 months (vs. did not)                                                      | 1.18             | (0.80 – 1.74) | 0.413   |
| Had an STI in past 12 months (vs. did not)                                                          | 1.10             | (0.60 – 2.03) | 0.758   |
| Had condomless sex with a non-spouse partner in past 12 months (vs. did not)                        | 1.01             | (0.83 – 1.23) | 0.907   |
| Perceived personal HIV risk                                                                         |                  |               |         |
| HIV-positive                                                                                        | 0.88             | (0.58 – 1.35) | 0.572   |
| No/low risk                                                                                         | REF              | -             | -       |
| Medium/high risk                                                                                    | 1.07             | (0.86 – 1.33) | 0.561   |

aRR = adjusted relative risk ratio, CI = confidence interval, REF = reference group

Figure 1. The distribution of perceptions about the prevalence of male circumcision in one's own village among adults across eight villages in Rwampara District, southwestern Uganda (N=1566).

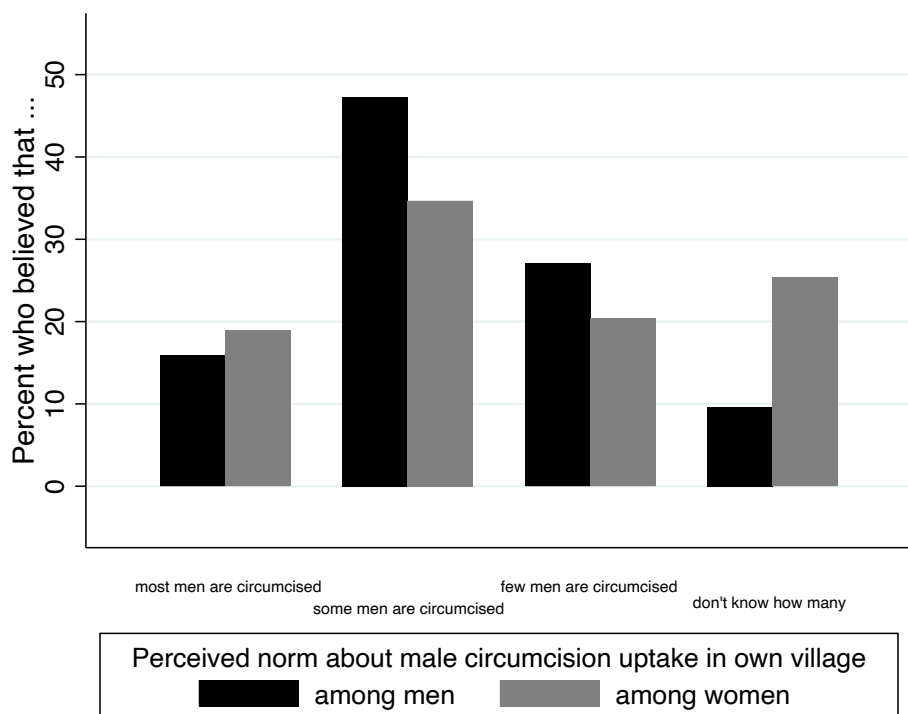

Figure 2. Predicted probabilities of being circumcised, stratified by their perception of the male circumcision prevalence in their own village after adjusting for other sociodemographic factors, among men <50 years of age across 8 villages in rural Uganda.

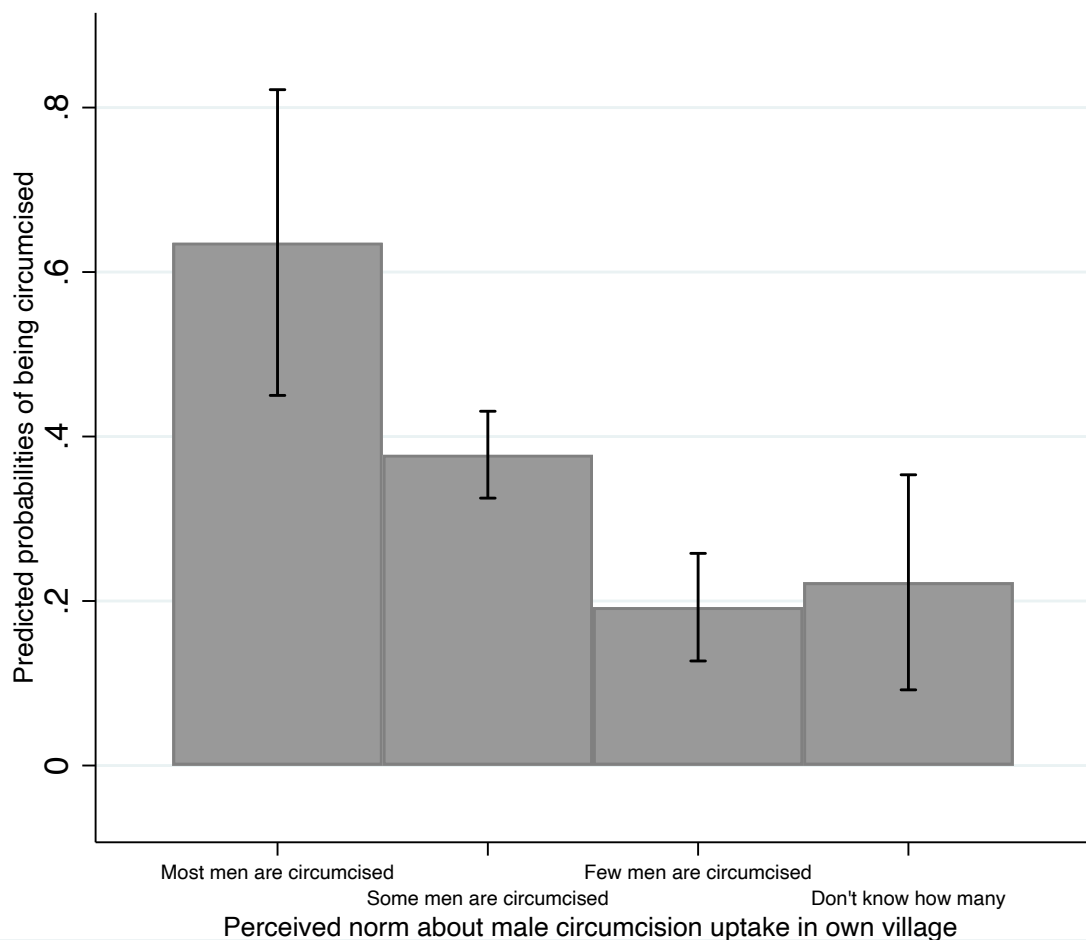

1 Supplemental Table 1. Perceived norms about male circumcision in own village among adult men across eight villages in Rwampara  
 2 District, southwest Uganda (N=698).

3

|                                                                      | N of male study participants | n and percent of men who believed most men are circumcised |     | n and percent of men who believed some men are circumcised |     | n and percent of men who believed few men are circumcised |     | n and percent of men did not know how many men are circumcised |     |
|----------------------------------------------------------------------|------------------------------|------------------------------------------------------------|-----|------------------------------------------------------------|-----|-----------------------------------------------------------|-----|----------------------------------------------------------------|-----|
| Total                                                                | 698                          | 111                                                        | 16% | 330                                                        | 47% | 189                                                       | 27% | 67                                                             | 10% |
| Age (years)                                                          |                              |                                                            |     |                                                            |     |                                                           |     |                                                                |     |
| 17-25                                                                | 102                          | 29                                                         | 28% | 46                                                         | 45% | 20                                                        | 20% | 7                                                              | 7%  |
| 26-35                                                                | 164                          | 25                                                         | 15% | 92                                                         | 56% | 39                                                        | 24% | 8                                                              | 5%  |
| 36-45                                                                | 157                          | 21                                                         | 13% | 71                                                         | 45% | 55                                                        | 35% | 10                                                             | 6%  |
| 46-55                                                                | 142                          | 17                                                         | 12% | 72                                                         | 51% | 37                                                        | 26% | 15                                                             | 11% |
| ≥56                                                                  | 130                          | 17                                                         | 13% | 49                                                         | 38% | 38                                                        | 29% | 26                                                             | 20% |
| Marital status                                                       |                              |                                                            |     |                                                            |     |                                                           |     |                                                                |     |
| Not married and not cohabiting                                       | 205                          | 40                                                         | 20% | 93                                                         | 45% | 50                                                        | 24% | 22                                                             | 11% |
| Married / cohabiting as if married                                   | 493                          | 71                                                         | 14% | 237                                                        | 48% | 139                                                       | 28% | 45                                                             | 9%  |
| Religion                                                             |                              |                                                            |     |                                                            |     |                                                           |     |                                                                |     |
| Catholic                                                             | 155                          | 22                                                         | 14% | 75                                                         | 48% | 40                                                        | 26% | 17                                                             | 11% |
| Muslim                                                               | 9                            | 2                                                          | 22% | 5                                                          | 56% | 2                                                         | 22% | 0                                                              | 0%  |
| Protestant                                                           | 505                          | 83                                                         | 16% | 234                                                        | 46% | 140                                                       | 28% | 48                                                             | 10% |
| Other (Not religious; Seventh-Day Adventist; Born-again Pentecostal) | 29                           | 4                                                          | 14% | 16                                                         | 55% | 7                                                         | 24% | 2                                                              | 7%  |
| Education                                                            |                              |                                                            |     |                                                            |     |                                                           |     |                                                                |     |
| None / some primary education                                        | 224                          | 31                                                         | 14% | 98                                                         | 44% | 65                                                        | 29% | 29                                                             | 13% |



|                                                                                       |     |    |     |     |     |     |     |    |     |
|---------------------------------------------------------------------------------------|-----|----|-----|-----|-----|-----|-----|----|-----|
| Completed primary education or more                                                   | 474 | 80 | 17% | 232 | 49% | 124 | 26% | 38 | 8%  |
| Household asset wealth                                                                |     |    |     |     |     |     |     |    |     |
| 1st quintile (poorest)                                                                | 111 | 17 | 15% | 55  | 50% | 33  | 30% | 6  | 5%  |
| 2nd quintile                                                                          | 138 | 23 | 17% | 64  | 46% | 41  | 30% | 10 | 7%  |
| 3rd quintile                                                                          | 142 | 23 | 16% | 73  | 51% | 31  | 22% | 15 | 11% |
| 4th quintile                                                                          | 152 | 24 | 16% | 68  | 45% | 39  | 26% | 20 | 13% |
| 5th quintile (least poor)                                                             | 155 | 24 | 15% | 70  | 45% | 45  | 29% | 16 | 10% |
| Lived with at least one woman who thought >50% of men in village had been circumcised |     |    |     |     |     |     |     |    |     |
| No                                                                                    | 559 | 91 | 16% | 263 | 47% | 151 | 27% | 54 | 10% |
| Yes                                                                                   | 139 | 20 | 14% | 67  | 48% | 38  | 27% | 13 | 9%  |
| Had been tested for HIV in past 12 months                                             |     |    |     |     |     |     |     |    |     |
| No                                                                                    | 383 | 57 | 15% | 175 | 46% | 106 | 28% | 44 | 12% |
| Yes                                                                                   | 315 | 54 | 17% | 155 | 49% | 83  | 26% | 23 | 7%  |
| Had an STI in past 12 months                                                          |     |    |     |     |     |     |     |    |     |
| No                                                                                    | 637 | 96 | 15% | 299 | 47% | 176 | 28% | 65 | 10% |
| Yes                                                                                   | 40  | 9  | 23% | 23  | 58% | 8   | 20% | 0  | 0%  |
| Had condomless sex with a non-spouse partner in past 12 months                        |     |    |     |     |     |     |     |    |     |
| No                                                                                    | 580 | 88 | 15% | 269 | 46% | 166 | 29% | 56 | 10% |
| Yes                                                                                   | 97  | 17 | 18% | 53  | 55% | 18  | 19% | 9  | 9%  |
| Perceived personal HIV risk                                                           |     |    |     |     |     |     |     |    |     |
| HIV-positive                                                                          | 67  | 12 | 18% | 27  | 40% | 22  | 33% | 6  | 9%  |
| No/low risk                                                                           | 546 | 90 | 16% | 267 | 49% | 138 | 25% | 51 | 9%  |
| Medium/high risk                                                                      | 77  | 9  | 12% | 33  | 43% | 26  | 34% | 8  | 11% |

5 Supplemental Table 2. Perceived norms about male circumcision in own village among adult women across eight villages in  
 6 Rwampara District, southwest Uganda (N=868).  
 7

|                                                                      | N of female study participants | n and percent of women who believed most men are circumcised |     | n and percent of women who believed some men are circumcised |     | n and percent of women who believed few men are circumcised |     | n and percent of women did not know how many men are circumcised |     |  |
|----------------------------------------------------------------------|--------------------------------|--------------------------------------------------------------|-----|--------------------------------------------------------------|-----|-------------------------------------------------------------|-----|------------------------------------------------------------------|-----|--|
| Total                                                                | 868                            | 164                                                          | 19% | 301                                                          | 35% | 177                                                         | 20% | 220                                                              | 26% |  |
| Age (years)                                                          |                                |                                                              |     |                                                              |     |                                                             |     |                                                                  |     |  |
| 18-25                                                                | 139                            | 32                                                           | 23% | 40                                                           | 29% | 37                                                          | 27% | 30                                                               | 22% |  |
| 26-35                                                                | 213                            | 40                                                           | 19% | 89                                                           | 42% | 48                                                          | 23% | 36                                                               | 17% |  |
| 36-45                                                                | 182                            | 31                                                           | 17% | 72                                                           | 40% | 41                                                          | 23% | 38                                                               | 21% |  |
| 46-55                                                                | 146                            | 38                                                           | 26% | 55                                                           | 38% | 23                                                          | 16% | 29                                                               | 20% |  |
| ≥56                                                                  | 174                            | 21                                                           | 12% | 42                                                           | 24% | 28                                                          | 16% | 78                                                               | 46% |  |
| Marital status                                                       |                                |                                                              |     |                                                              |     |                                                             |     |                                                                  |     |  |
| Not married and not cohabiting                                       | 337                            | 56                                                           | 17% | 97                                                           | 29% | 71                                                          | 21% | 109                                                              | 33% |  |
| Married / cohabiting as if married                                   | 531                            | 108                                                          | 20% | 204                                                          | 38% | 106                                                         | 20% | 111                                                              | 21% |  |
| Religion                                                             |                                |                                                              |     |                                                              |     |                                                             |     |                                                                  |     |  |
| Catholic                                                             | 189                            | 31                                                           | 16% | 75                                                           | 40% | 39                                                          | 21% | 44                                                               | 23% |  |
| Muslim                                                               | 13                             | 5                                                            | 38% | 2                                                            | 15% | 2                                                           | 15% | 4                                                                | 31% |  |
| Protestant                                                           | 617                            | 120                                                          | 19% | 211                                                          | 34% | 123                                                         | 20% | 157                                                              | 26% |  |
| Other (Not religious; Seventh-Day Adventist; Born-again Pentecostal) | 49                             | 8                                                            | 16% | 13                                                           | 27% | 13                                                          | 27% | 15                                                               | 31% |  |
| Education                                                            |                                |                                                              |     |                                                              |     |                                                             |     |                                                                  |     |  |
| None / some primary education                                        | 402                            | 74                                                           | 18% | 134                                                          | 33% | 63                                                          | 16% | 126                                                              | 32% |  |
| Completed primary education or more                                  | 466                            | 90                                                           | 19% | 167                                                          | 36% | 114                                                         | 24% | 94                                                               | 20% |  |

|                                                                                       |     |     |     |     |     |     |     |     |     |
|---------------------------------------------------------------------------------------|-----|-----|-----|-----|-----|-----|-----|-----|-----|
| Household asset wealth                                                                |     |     |     |     |     |     |     |     |     |
| 1st quintile (poorest)                                                                | 202 | 39  | 19% | 60  | 30% | 40  | 20% | 62  | 31% |
| 2nd quintile                                                                          | 175 | 33  | 19% | 68  | 39% | 36  | 21% | 35  | 20% |
| 3rd quintile                                                                          | 172 | 35  | 20% | 62  | 36% | 32  | 19% | 43  | 25% |
| 4th quintile                                                                          | 161 | 29  | 18% | 54  | 34% | 37  | 23% | 40  | 25% |
| 5th quintile (least poor)                                                             | 158 | 28  | 18% | 57  | 36% | 32  | 20% | 40  | 25% |
| Lived with at least one woman who thought >50% of men in village had been circumcised |     |     |     |     |     |     |     |     |     |
| No                                                                                    | 643 | 22  | 3%  | 271 | 42% | 154 | 24% | 190 | 30% |
| Yes                                                                                   | 225 | 142 | 63% | 30  | 13% | 23  | 10% | 30  | 13% |
| Had been tested for HIV in past 12 months                                             |     |     |     |     |     |     |     |     |     |
| No                                                                                    | 416 | 83  | 20% | 134 | 32% | 65  | 16% | 130 | 32% |
| Yes                                                                                   | 452 | 81  | 18% | 167 | 37% | 112 | 25% | 90  | 20% |
| Had an STI in past 12 months                                                          |     |     |     |     |     |     |     |     |     |
| No                                                                                    | 803 | 153 | 19% | 285 | 35% | 157 | 20% | 202 | 25% |
| Yes                                                                                   | 35  | 6   | 17% | 9   | 26% | 8   | 23% | 12  | 34% |
| Had condomless sex with a non-spouse partner in past 12 months                        |     |     |     |     |     |     |     |     |     |
| No                                                                                    | 756 | 143 | 19% | 272 | 36% | 148 | 20% | 187 | 25% |
| Yes                                                                                   | 82  | 16  | 20% | 22  | 27% | 17  | 21% | 27  | 33% |
| Perceived personal HIV risk                                                           |     |     |     |     |     |     |     |     |     |
| HIV-positive                                                                          | 113 | 25  | 22% | 43  | 38% | 24  | 21% | 21  | 19% |
| No/low risk                                                                           | 598 | 101 | 17% | 202 | 34% | 126 | 21% | 164 | 28% |
| Medium/high risk                                                                      | 143 | 35  | 24% | 48  | 34% | 26  | 18% | 33  | 23% |

Supplemental Table 3. Modified multivariable Poisson regression model estimating associations between the perceived norm about circumcision status among men in one's village and being personally circumcised among almost all resident adult men across eight villages in Rwampara District, southwestern Uganda (n=649 men).

|                                                                                                     | Yes, circumcised |               |         |
|-----------------------------------------------------------------------------------------------------|------------------|---------------|---------|
|                                                                                                     | aRR              | (95% CI)      | p-value |
| Perceived norm about male circumcision uptake in own village                                        |                  |               |         |
| Most men are circumcised (i.e., >50%)                                                               | 1.82             | (1.45 – 2.28) | <0.001  |
| Some men are circumcised (i.e., 10% to <50%)                                                        | REF              | -             | -       |
| Few men are circumcised (i.e., 0 to <10%)                                                           | 0.52             | (0.35 – 0.77) | 0.001   |
| Don't know how many men are circumcised                                                             | 0.73             | (0.44 – 1.21) | 0.221   |
| Age (years)                                                                                         |                  |               |         |
| 18-25                                                                                               | REF              | -             | -       |
| 26-35                                                                                               | 0.96             | (0.75 – 1.23) | 0.726   |
| 36-45                                                                                               | 0.84             | (0.67 – 1.05) | 0.127   |
| 46-55                                                                                               | 0.52             | (0.39 – 0.69) | <0.001  |
| 56+                                                                                                 | 0.23             | (0.15 – 0.35) | <0.001  |
| Married / cohabiting (vs. other)                                                                    | 1.08             | (0.88 – 1.34) | 0.448   |
| Religion                                                                                            |                  |               |         |
| Catholic                                                                                            | REF              | -             | -       |
| Muslim                                                                                              | 2.85             | (2.13 – 3.81) | <0.001  |
| Protestant                                                                                          | 0.87             | (0.60 – 1.25) | 0.454   |
| Other                                                                                               | 1.31             | (0.83 – 2.07) | 0.241   |
| Completed primary education or more (vs. did not)                                                   | 1.64             | (1.13 – 2.39) | 0.009   |
| Household asset quintile                                                                            |                  |               |         |
| 1st quintile (poorest)                                                                              | REF              | -             | -       |
| 2nd quintile                                                                                        | 0.95             | (0.69 – 1.29) | 0.734   |
| 3rd quintile                                                                                        | 0.88             | (0.53 – 1.45) | 0.604   |
| 4th quintile                                                                                        | 0.94             | (0.67 – 1.30) | 0.688   |
| 5th quintile (least poor)                                                                           | 1.24             | (0.85 – 1.82) | 0.269   |
| Lived with at least one woman who thought >50% of men in village had been circumcised (vs. did not) | 1.10             | (0.71 – 1.72) | 0.669   |
| Tested for HIV in past 12 months (vs. did not)                                                      | 1.09             | (0.82 – 1.46) | 0.539   |
| Had an STI in past 12 months (vs. did not)                                                          | 1.01             | (0.54 – 1.92) | 0.964   |
| Had condomless sex with a non-spouse partner in past 12 months (vs. did not)                        | 1.07             | (0.88 – 1.31) | 0.492   |
| Perceived personal HIV risk                                                                         |                  |               |         |
| HIV-positive                                                                                        | 1.13             | (0.74 – 1.74) | 0.565   |
| No/low risk                                                                                         | REF              | -             | -       |
| Medium/high risk                                                                                    | 1.03             | (0.90 – 1.17) | 0.710   |

aRR = adjusted relative risk ratio, CI = confidence interval, REF = reference group
